# Supplementary material for: Studies of the Effectiveness of Bisphosphonate and Vanadium‐Bisphosphonate Compounds In Vitro against Axenic Leishmania tarentolae
Source: Hindawi journal article supplement (doi:10.1155/2016/9025627), 2016-01-01
Supplement: f1 [file 9025627.f1.zip]

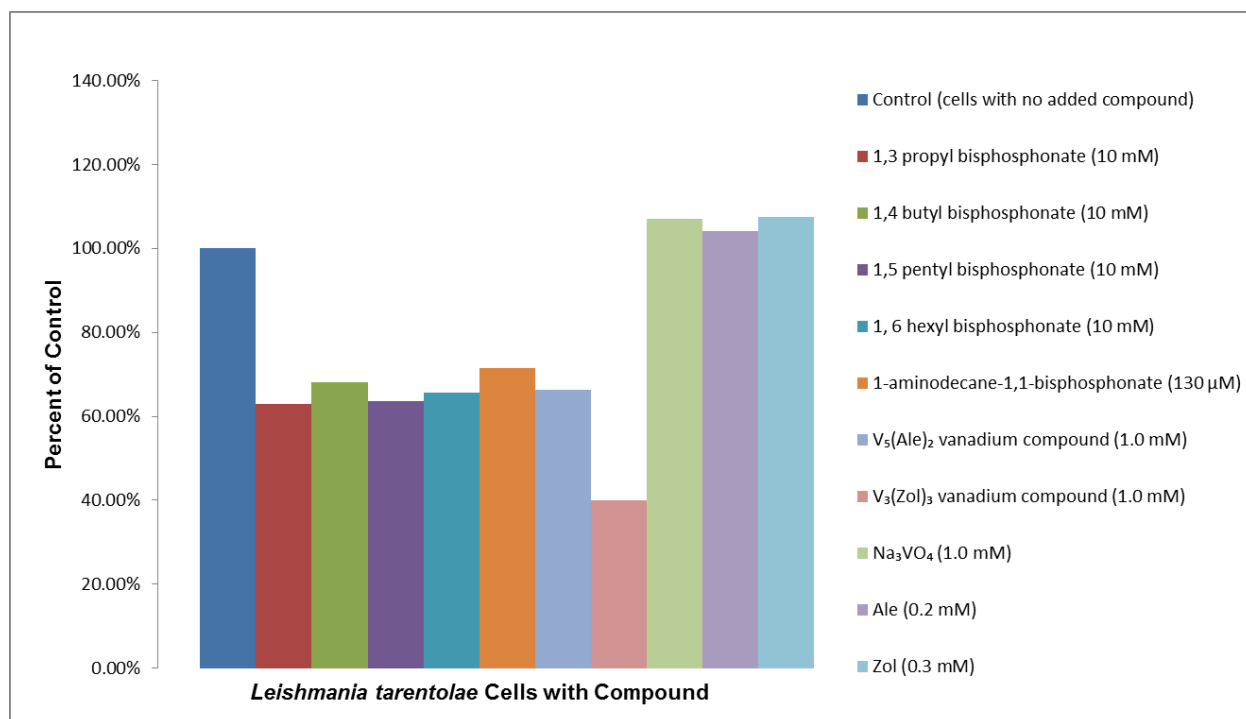

**Figure S1.** MTT cell viability assay of day 3 cells incubated 3 hours with test compounds (mean  $\pm$  SD, n=4) as percent of control.

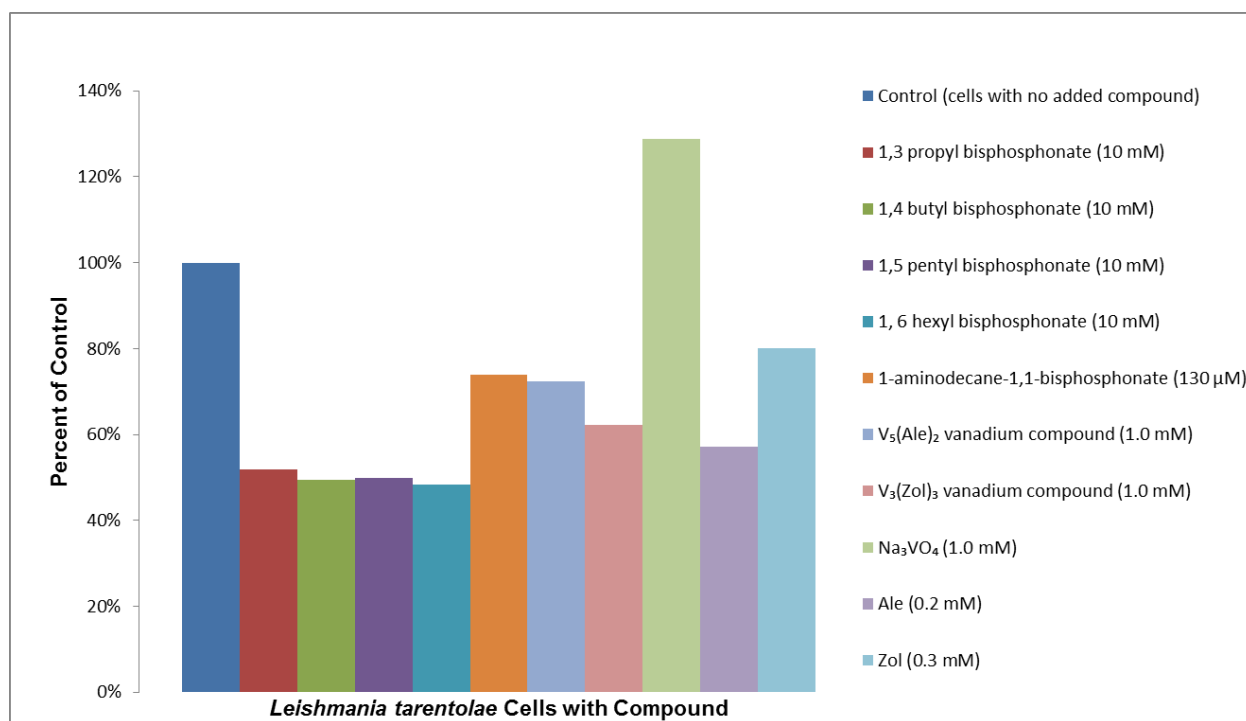

**Figure S2.** MTT cell viability assay of cells incubated with test compounds after 27 hours (mean  $\pm$  SD, n=4) as percent of control.
